# Supplementary material for: Modified reverse ADOR assembles Al-rich UTL zeolite from IPC-1P layers
Source: Royal Society of Chemistry journal article supplement (doi:10.1039/d2qi01360f), 2022-01-01
Supplement: d2qi01360f1.pdf [file d2qi01360f1.pdf]

Modified Reverse ADOR assembles Al-rich **UTL** zeolite from IPC-1P layers

Ondřej Veselý, Michal Mazur, Jan Přeč, Jiří Čejka

Department of Physical and Macromolecular Chemistry, Faculty of Sciences, Charles University, Hlavova 8, 128 43 Prague 2,  
Czech Republic

Supplementary information

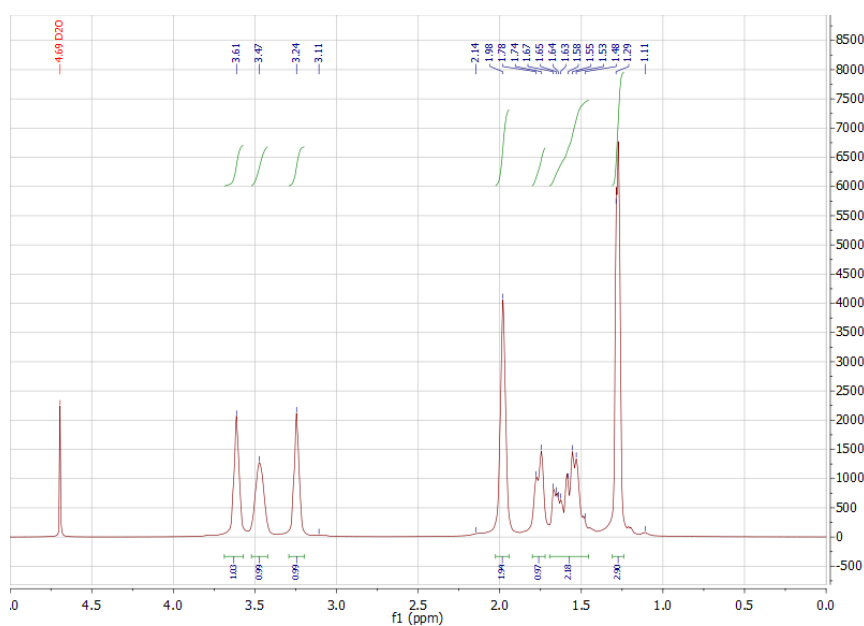

Fig. S1:  $^1\text{H}$  NMR spectrum of the dimethyl-5-anizospiro[4.5]decane (DMASD) bromide in  $\text{D}_2\text{O}$

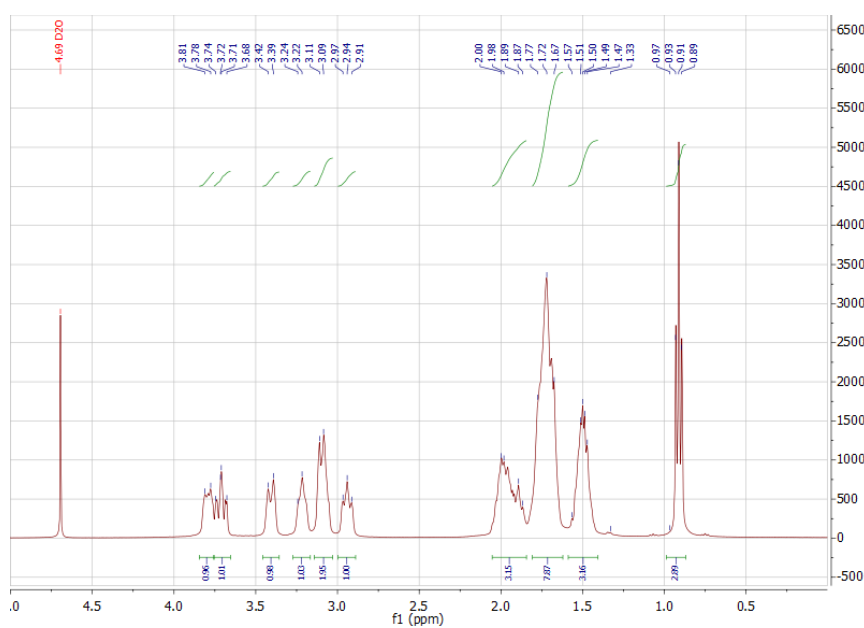

Fig. S2:  $^1\text{H}$  NMR spectrum of the 7-ethyl-6-azoniaspiro[5.5]undecane (EASuD) bromide in  $\text{D}_2\text{O}$

Table S1: Composition of synthesis mixtures for samples of reconstructed **UTL** samples

| Sample                              | $C_{\text{HCl/EtOH}}$<br>(mol/l) | $\text{Me}_2(\text{EtO})_2\text{Si}$<br>(mg) | $(\text{MeO})_4\text{Ge}$ (mg) | $\text{NH}_4\text{F}$ (mg) | $\text{Al}(\text{NO}_3)_3 \cdot 9\text{H}_2\text{O}$<br>(mg) |
|-------------------------------------|----------------------------------|----------------------------------------------|--------------------------------|----------------------------|--------------------------------------------------------------|
| 3Si:1Al                             | 1.25                             | 49.4                                         | 0                              | 2.1                        | 41.6                                                         |
| 1Si:1Al                             | 1.25                             | 32.9                                         | 0                              | 2.1                        | 83.3                                                         |
| 1Si:3Al                             | 1.25                             | 16.5                                         | 0                              | 2.1                        | 124.9                                                        |
| Pure Al $\equiv$ pHCl<br>= -0.1 (F) | 1.25                             | 0                                            | 0                              | 2.1                        | 166.5                                                        |
| pHCl = 1 (Ge)                       | $10^{-1}$                        | 24.7                                         | 32.8                           | 0                          | 37.7                                                         |
| pHCl = 3 (Ge)                       | $10^{-3}$                        | 24.7                                         | 32.8                           | 0                          | 37.7                                                         |
| pHCl = 5 (Ge)                       | $10^{-5}$                        | 24.7                                         | 32.8                           | 0                          | 37.7                                                         |
| pHCl = 1 (F)                        | $10^{-1}$                        | 50.9                                         | 0                              | 2.1                        | 37.7                                                         |
| pHCl = 3 (F)                        | $10^{-3}$                        | 50.9                                         | 0                              | 2.1                        | 37.7                                                         |
| pHCl = 5 (F)                        | $10^{-5}$                        | 50.9                                         | 0                              | 2.1                        | 37.7                                                         |
| Re-UTL (Al)                         | $10^{-3}$                        | 50.9                                         | 0                              | 2.1                        | 37.7                                                         |
| Re-UTL<br>(Al+Ge)                   | $10^{-3}$                        | 24.7                                         | 32.8                           | 0                          | 37.7                                                         |

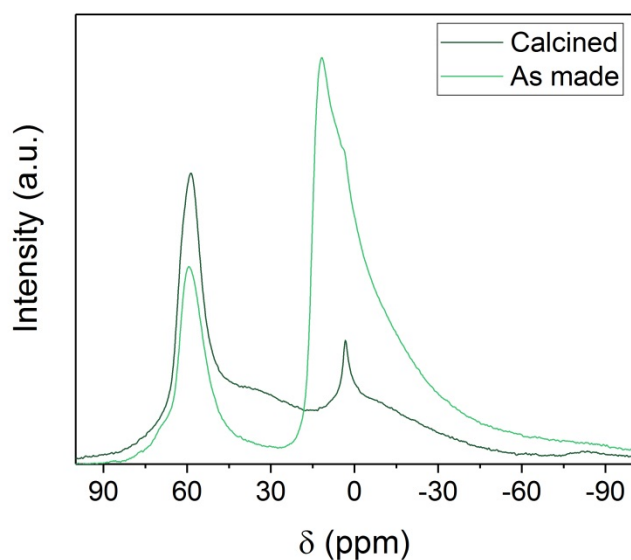

Fig. S3:  $^{27}\text{Al}$  MAS MNR spectra of “pure Al” reconstructed **UTL** before and after calcination

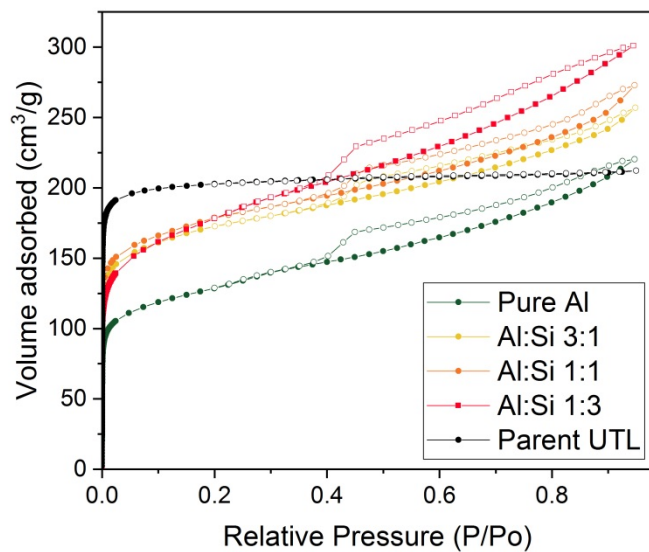

Fig. S4: Argon adsorption-desorption isotherms of **UTL** zeolites reconstructed with varying aluminium content

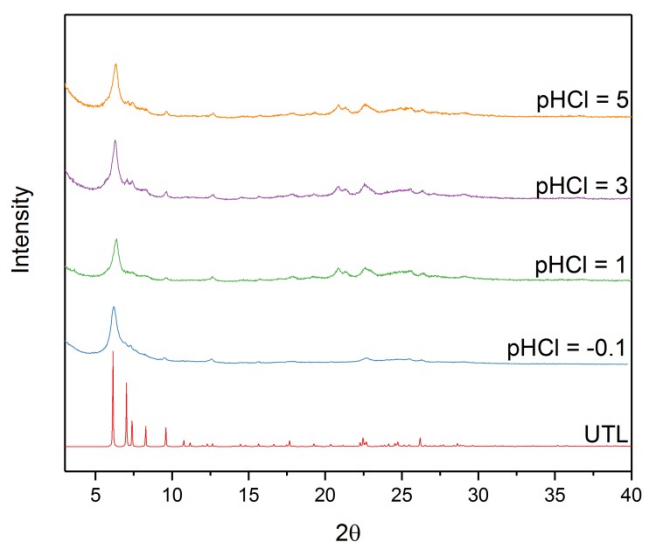

Fig. S5: Powder XRD patterns of **UTL** zeolites reconstructed by fluoride-assisted Reverse ADOR under varying acidity

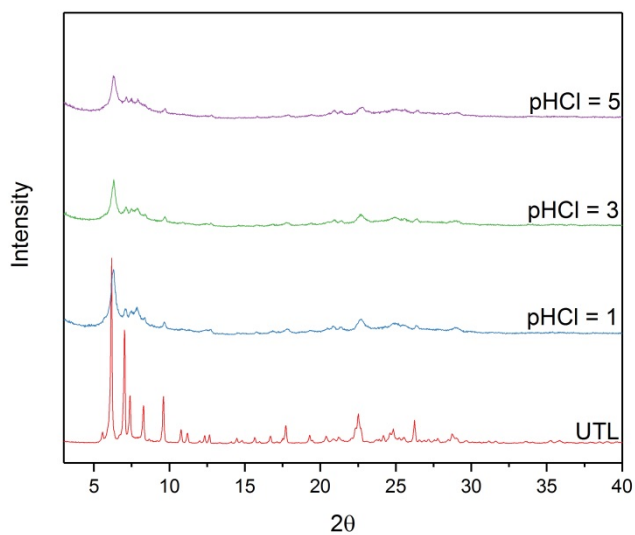

Fig. S6: Powder XRD patterns of **UTL** zeolites reconstructed by germanium-assisted Reverse ADOR under varying acidity

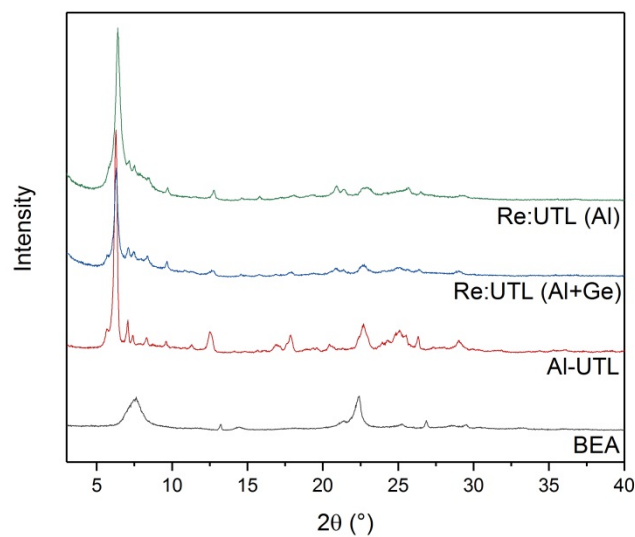

Fig. S7: Powder XRD patterns of **BEA**, Al-UTL and reconstructed **UTL** zeolites

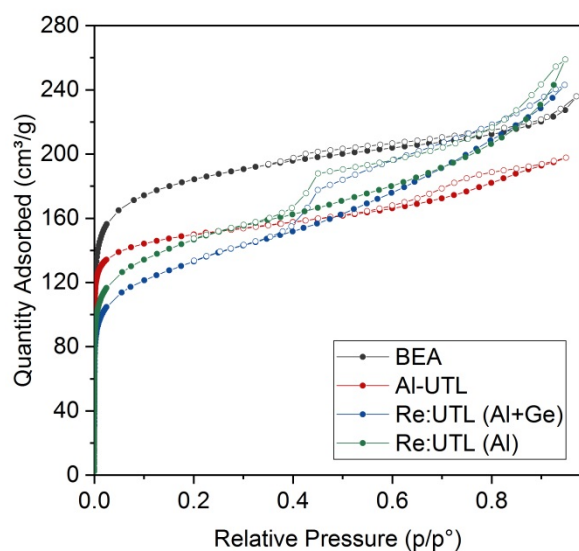

Fig. S8: Argon adsorption-desorption isotherms of **BEA**, Al-UTL and reconstructed **UTL** zeolites

Table S2: Textural and acidic properties of **BEA**, Al-UTL and reconstructed **UTL** zeolites

|                | BET<br>(m <sup>2</sup> /g) | S <sub>ext</sub><br>(m <sup>2</sup> /g) | V <sub>tot</sub><br>(cm <sup>3</sup> /g) | V <sub>mic</sub><br>(cm <sup>3</sup> /g) | C <sub>Brønsted</sub><br>(μmol/g) | C <sub>Lewis</sub><br>(μmol/g) |
|----------------|----------------------------|-----------------------------------------|------------------------------------------|------------------------------------------|-----------------------------------|--------------------------------|
| BEA            | 560                        | 170                                     | 0.30                                     | 0.16                                     | 300                               | 100                            |
| Al-UTL         | 454                        | 64                                      | 0.25                                     | 0.15                                     | 46                                | 74                             |
| Re-UTL (Al+Ge) | 409                        | 180                                     | 0.31                                     | 0.08                                     | 25                                | 75                             |
| Re-UTL (Al)    | 450                        | 138                                     | 0.33                                     | 0.09                                     | 21                                | 54                             |
